# Supplementary material for: Regulation of Cortico-Thalamic JNK1/2 and ERK1/2 MAPKs and Apoptosis-Related Signaling Pathways in PDYN Gene-Deficient Mice Following Acute and Chronic Mild Stress
Source: Int J Mol Sci. 2023 Jan 24;24(3):2303. doi: 10.3390/ijms24032303 (PMC9916432; doi:10.3390/ijms24032303)
Supplement: Supplementary file 1 [file ijms-24-02303-s001.zip › ijms-2109079-SI.pdf]

**Supplementary Table S1.** Contingency table summarizing the distribution of mice across the experimental groups of the study

| Stress procedure            | Genotype |         | Total |
|-----------------------------|----------|---------|-------|
|                             | WT       | PDYN-KO |       |
| Basal stress                | 9        | 9       | 18    |
| Acute restrain stress (ARS) | 8        | 7       | 15    |
| Chronic mild stress (CMS)   | 8        | 7       | 15    |
| Total                       | 25       | 23      | 48    |
